# Supplementary material for: Glucose oxidase and Au nanocluster co-encapsulated metal–organic frameworks as a sensitive colorimetric sensor for glucose based on a cascade reaction
Source: Royal Society of Chemistry journal article supplement (doi:10.1039/c9nj06339k), 2020-01-01
Supplement: c9nj06339k1.pdf [file c9nj06339k1.pdf]

## Supplementary Information

### **Glucose oxidase and Au nanoclusters co-encapsulated metal-organic frameworks using as sensitive colorimetric sensor for glucose based on cascade reaction**

Jingtian Chi,<sup>a</sup> Manli Guo,<sup>a</sup> Chi Zhang,<sup>b</sup> Yuanhong Zhang,<sup>b</sup> Shiyun Ai,<sup>b</sup> Juying Hou,<sup>\*,b</sup>

Peng Wu,<sup>\*,a</sup> Xiangyang Li<sup>\*,a</sup>

*<sup>a</sup>College of Food Science and Engineering, Shandong Agricultural University, Taian, Shandong 271018, P.R. China*

*<sup>b</sup>College of Chemistry and Material Science, Shandong Agricultural University, Taian, Shandong 271018, P.R. China*

\* Corresponding authors:

E-mail: [juyinghou@sdau.edu.cn](mailto:juyinghou@sdau.edu.cn) (Juying Hou); [wupengguai@163.com](mailto:wupengguai@163.com) (Peng Wu);

[xiangyang\\_l@163.com](mailto:xiangyang_l@163.com) (Xiangyang Li).

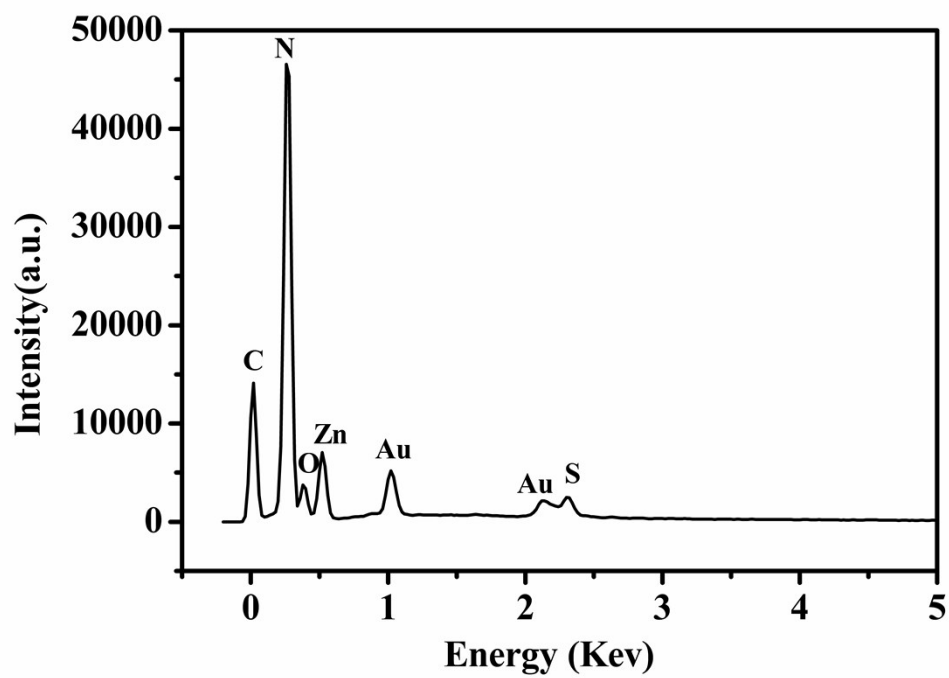

Fig.S1. EDS analysis of GOx&AuNCs@ZIF-8.

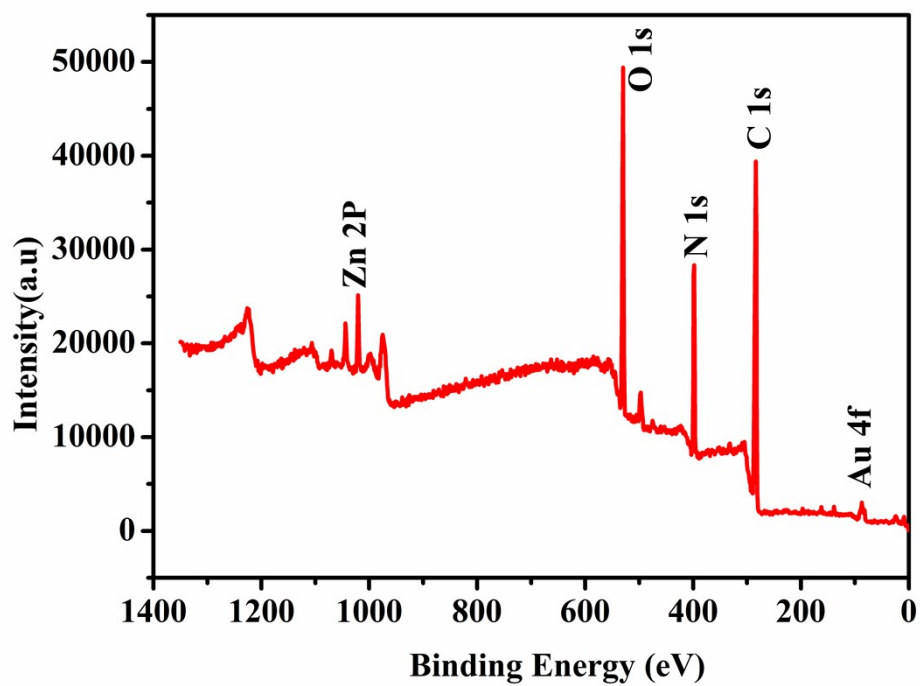

Fig.S2. XPS patterns of GOx&AuNCs@ZIF-8 composite.

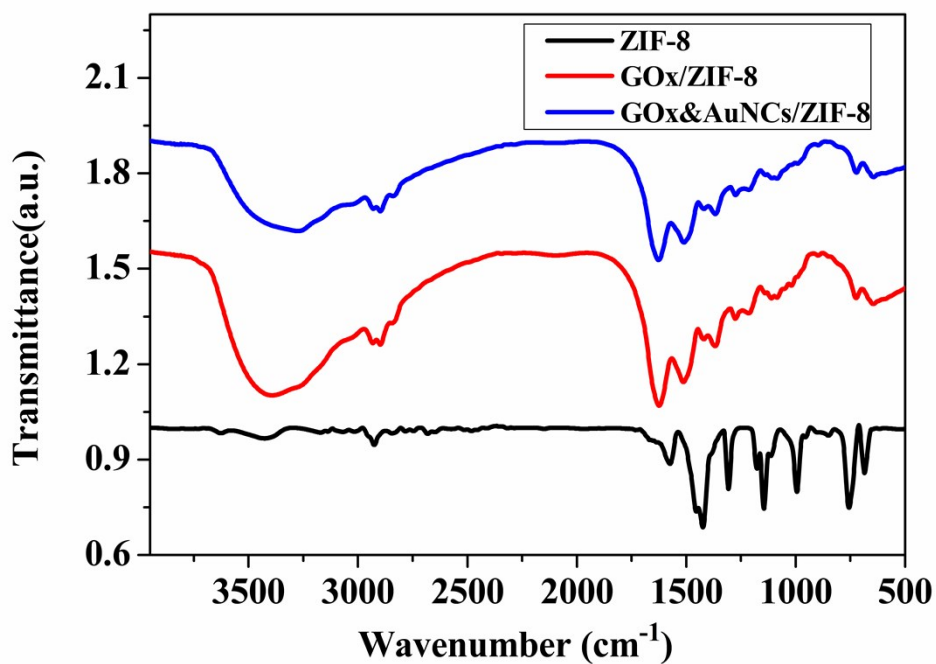

**Fig.S3.** FT-IR spectrum of ZIF-8, GOx@ZIF-8, and GOx&AuNCs@ZIF-8.

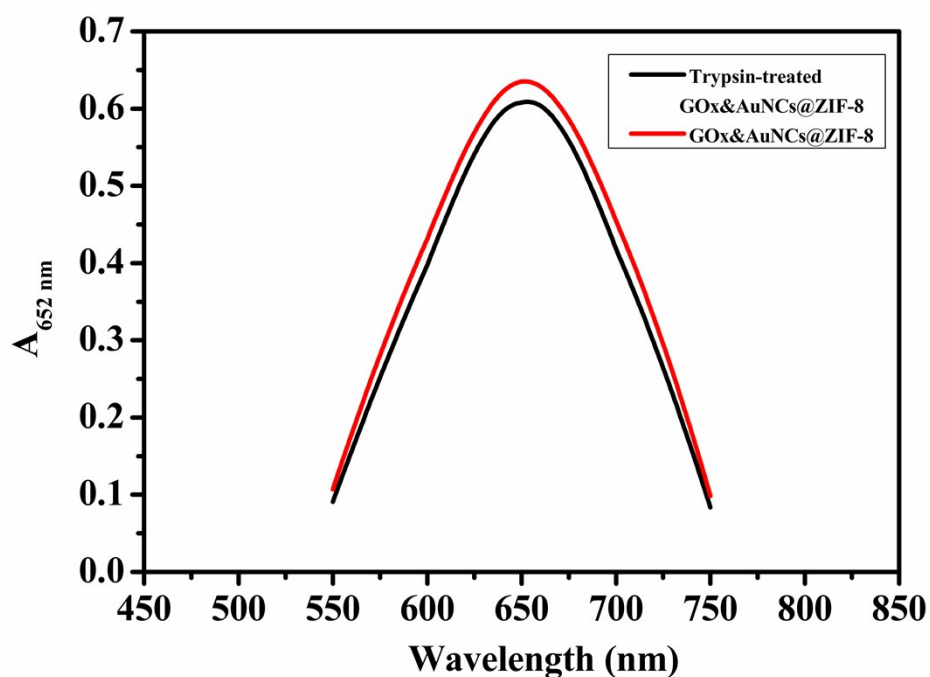

**Fig.S4.** UV-vis absorption spectrum of oxTMB generated by GOx&AuNCs@ZIF-8 composite before and after incubation with trypsin.

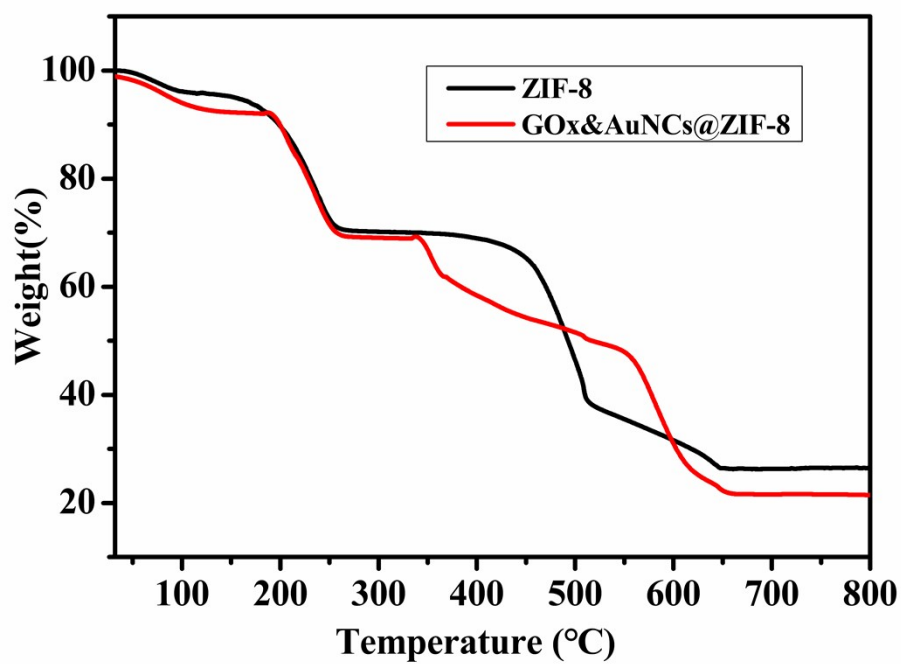

**Fig.S5.** TGA curves of GOx&AuNCs@ZIF-8 composite and ZIF-8 in air.

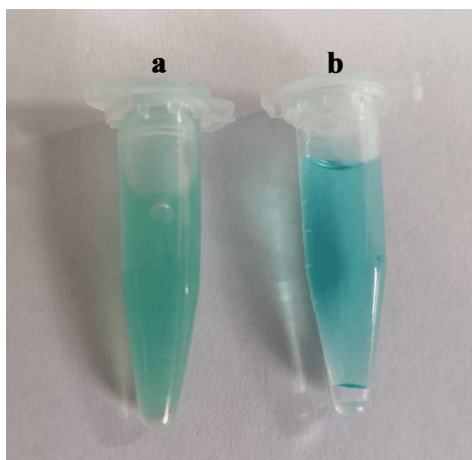

**Fig.S6.** Corresponding image of GOx&AuNCs@ZIF-8/glucoase/TMB after incubation in the pH 3.0 acetate buffer about 10 min (a) and about 30 min (b).

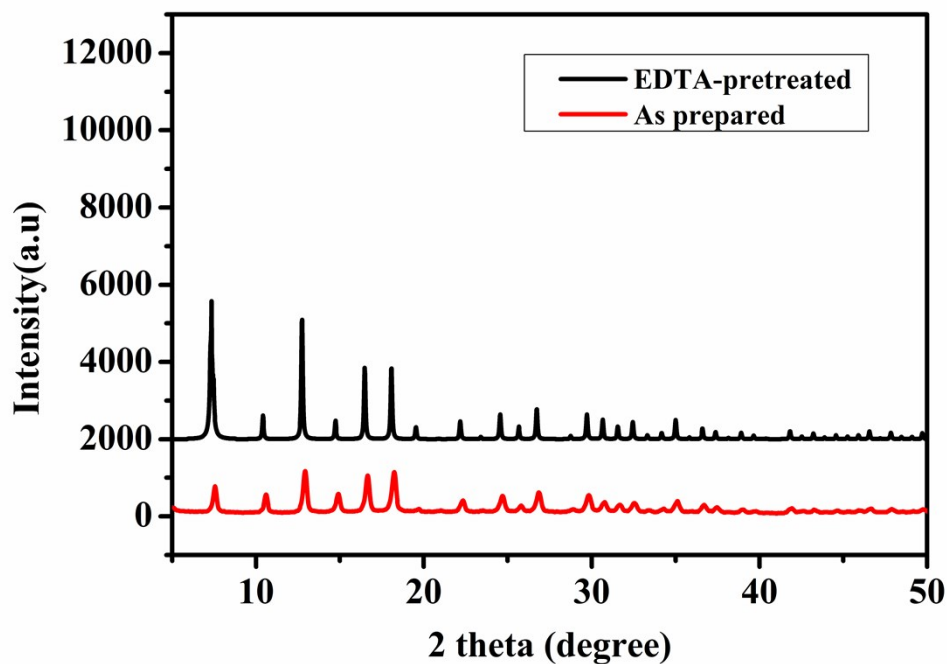

**Fig.S7.** XRD patterns of GOx&AuNCs@ZIF-8 composites with and without EDTA-pretreatment.

**Table S1.** Comparison of the apparent maximum reaction rate ( $V_{max}$ ) and Michaelis constant ( $K_m$ ) data between GOx&AuNCs@ZIF-8 and GOx/AuNCs.

| Catalyst        | Substance | $K_m$ (mM) | $V_{max}$ ( $10^{-8}$ M s $^{-1}$ ) |
|-----------------|-----------|------------|-------------------------------------|
| GOx&AuNCs@ZIF-8 | TMB       | 0.4        | 2                                   |
| GOx/AuNCs       | TMB       | 0.6        | 2.4                                 |

**Table S2.** The comparison of linear ranges and LOD for glucose detection of this work with other reported sensors.

| Catalyst                 | Linear ranges ( $\mu$ M) | LOD ( $\mu$ M) | Reference |
|--------------------------|--------------------------|----------------|-----------|
| CeO $_2$ /TiO $_2$ NTs   | 10-500                   | 6.1            | 1         |
| CoAl-ELDH                | 50-500                   | 50             | 2         |
| NiFe-LDHNS               | 50-2000                  | 23             | 3         |
| Co $_3$ O $_4$ @CeO $_2$ | 1-75                     | 1.9            | 4         |

|                 |      |     |           |
|-----------------|------|-----|-----------|
| GOx&AuNCs@ZIF-8 | 1-25 | 0.8 | This work |
|-----------------|------|-----|-----------|

**Table S3.** Determination of glucose in real samples using GOx&AuNCs@ZIF-8.

| Added<br>( $\mu\text{M}$ ) | Serum samples<br>Found ( $\mu\text{M}$ ) | RSD<br>(%) | Recovery<br>(%) |
|----------------------------|------------------------------------------|------------|-----------------|
| 5                          | 4.65                                     | 2.53       | 93              |
| 10                         | 9.14                                     | 2.83       | 91.4            |
| 20                         | 20.12                                    | 3.06       | 100.6           |

### References

1. H. Zhao, Y. Dong, P. Jiang, G. Wang and J. Zhang, *ACS Appl. Mater. Inter.*, 2015, **7**, 6451-6461.
2. W. Yang, J. Li, M. Liu, D. H. L. Ng, Y. Liu, X. Sun and J. Yang, *Appl. Clay Sci.*, 2019, **181**, 105238.
3. T. Zhan, J. Kang, X. Li, L. Pan, G. Li and W. Hou, *Sensor. Actuat. B: Chem.*, 2018, **255**, 2635-2642.
4. D. Jampaiah, T. Srinivasa Reddy, V. E. Coyle, A. Nafady and S. K. Bhargava, *J. Mater. Chem. B*, 2017, **5**, 720-730.
